# Supplementary material
Source: MDPI journal article supplement (https://www.mdpi.com/2072-4292/13/20/4136)
Supplement: s1 [file s1]

## Supplementary Materials

**Table S1.** List of acquisition dates of Sentinel-2.

|            |            |            |            |            |            |
|------------|------------|------------|------------|------------|------------|
| 2015-10-27 | 2017-10-16 | 2018-08-27 | 2019-05-29 | 2020-02-28 | 2020-12-14 |
| 2015-10-27 | 2017-10-31 | 2018-09-01 | 2019-06-03 | 2020-03-04 | 2020-12-19 |
| 2015-11-16 | 2017-11-05 | 2018-09-06 | 2019-06-08 | 2020-03-09 | 2020-12-29 |
| 2015-11-16 | 2017-11-20 | 2018-09-11 | 2019-06-13 | 2020-03-14 | 2021-01-08 |
| 2015-12-16 | 2017-11-25 | 2018-09-16 | 2019-06-18 | 2020-03-19 | 2021-01-13 |
| 2015-12-16 | 2017-11-30 | 2018-09-21 | 2019-06-23 | 2020-03-24 | 2021-01-18 |
| 2016-01-15 | 2017-12-10 | 2018-09-26 | 2019-06-28 | 2020-03-29 | 2021-01-23 |
| 2016-01-15 | 2017-12-15 | 2018-10-01 | 2019-07-03 | 2020-04-03 | 2021-01-28 |
| 2016-02-14 | 2017-12-20 | 2018-10-06 | 2019-07-08 | 2020-04-08 | 2021-02-02 |
| 2016-02-14 | 2017-12-30 | 2018-10-11 | 2019-07-13 | 2020-04-13 | 2021-02-07 |
| 2016-04-14 | 2018-01-04 | 2018-10-16 | 2019-07-18 | 2020-04-18 | 2021-02-12 |
| 2016-04-14 | 2018-01-09 | 2018-10-21 | 2019-07-23 | 2020-04-23 | 2021-02-17 |
| 2016-05-14 | 2018-01-19 | 2018-10-26 | 2019-07-28 | 2020-04-28 | 2021-02-22 |
| 2016-05-14 | 2018-01-24 | 2018-10-31 | 2019-08-02 | 2020-05-03 | 2021-02-27 |
| 2016-06-23 | 2018-01-29 | 2018-11-05 | 2019-08-07 | 2020-05-08 | 2021-03-04 |
| 2016-06-23 | 2018-02-08 | 2018-11-10 | 2019-08-12 | 2020-05-13 | 2021-03-09 |
| 2016-07-13 | 2018-02-13 | 2018-11-15 | 2019-08-17 | 2020-05-18 | 2021-03-14 |
| 2016-07-13 | 2018-02-18 | 2018-11-20 | 2019-08-22 | 2020-05-23 | 2021-03-19 |
| 2016-08-02 | 2018-02-23 | 2018-11-25 | 2019-08-27 | 2020-05-28 | 2021-03-24 |
| 2016-08-02 | 2018-02-28 | 2018-11-30 | 2019-09-01 | 2020-06-02 | 2021-03-29 |
| 2016-08-22 | 2018-03-05 | 2018-12-05 | 2019-09-06 | 2020-06-07 | 2021-04-03 |
| 2016-08-22 | 2018-03-10 | 2018-12-10 | 2019-09-11 | 2020-06-17 | 2021-04-08 |
| 2016-09-11 | 2018-03-15 | 2018-12-15 | 2019-09-16 | 2020-06-22 | 2021-04-13 |
| 2016-09-11 | 2018-03-20 | 2018-12-20 | 2019-09-21 | 2020-06-27 | 2021-04-18 |
| 2016-10-01 | 2018-03-25 | 2018-12-25 | 2019-09-26 | 2020-07-02 | 2021-04-23 |
| 2016-10-01 | 2018-03-30 | 2018-12-30 | 2019-10-01 | 2020-07-07 | 2021-04-28 |
| 2016-10-21 | 2018-04-04 | 2019-01-04 | 2019-10-06 | 2020-07-12 | 2021-05-03 |
| 2016-10-21 | 2018-04-09 | 2019-01-09 | 2019-10-11 | 2020-07-17 | 2021-05-08 |
| 2016-11-10 | 2018-04-14 | 2019-01-14 | 2019-10-16 | 2020-07-22 | 2021-05-13 |
| 2016-11-10 | 2018-04-19 | 2019-01-19 | 2019-10-21 | 2020-07-27 | 2021-05-18 |
| 2016-11-20 | 2018-04-24 | 2019-01-24 | 2019-10-26 | 2020-08-01 | 2021-05-23 |
| 2016-11-20 | 2018-04-29 | 2019-01-29 | 2019-10-31 | 2020-08-11 | 2021-05-28 |
| 2016-11-30 | 2018-05-04 | 2019-02-03 | 2019-11-05 | 2020-08-16 | 2021-06-02 |
| 2016-11-30 | 2018-05-09 | 2019-02-08 | 2019-11-10 | 2020-08-21 | 2021-06-07 |
| 2016-12-20 | 2018-05-14 | 2019-02-13 | 2019-11-15 | 2020-08-26 | 2021-06-12 |

|            |            |            |            |            |            |
|------------|------------|------------|------------|------------|------------|
| 2016-12-30 | 2018-05-19 | 2019-02-18 | 2019-11-20 | 2020-08-31 | 2021-06-17 |
| 2017-01-29 | 2018-05-24 | 2019-02-23 | 2019-11-25 | 2020-09-05 | 2021-06-22 |
| 2017-02-08 | 2018-05-29 | 2019-02-28 | 2019-11-30 | 2020-09-10 | 2021-06-27 |
| 2017-02-18 | 2018-06-03 | 2019-03-05 | 2019-12-05 | 2020-09-15 | 2021-07-02 |
| 2017-03-10 | 2018-06-08 | 2019-03-10 | 2019-12-10 | 2020-09-20 | 2021-07-07 |
| 2017-03-30 | 2018-06-13 | 2019-03-15 | 2019-12-15 | 2020-09-25 | 2021-07-12 |
| 2017-04-19 | 2018-06-18 | 2019-03-20 | 2019-12-20 | 2020-09-30 | 2021-07-17 |
| 2017-05-09 | 2018-06-23 | 2019-03-25 | 2019-12-25 | 2020-10-05 | 2021-07-22 |
| 2017-05-29 | 2018-06-28 | 2019-03-30 | 2019-12-30 | 2020-10-10 | 2021-07-27 |
| 2017-06-18 | 2018-07-03 | 2019-04-04 | 2020-01-04 | 2020-10-15 | 2021-08-01 |
| 2017-07-03 | 2018-07-08 | 2019-04-09 | 2020-01-09 | 2020-10-20 | 2021-08-06 |
| 2017-07-23 | 2018-07-13 | 2019-04-14 | 2020-01-14 | 2020-10-25 | 2021-08-11 |
| 2017-07-28 | 2018-07-18 | 2019-04-19 | 2020-01-19 | 2020-10-30 | 2021-08-16 |
| 2017-08-12 | 2018-07-23 | 2019-04-24 | 2020-01-24 | 2020-11-04 | 2021-08-21 |
| 2017-08-17 | 2018-07-28 | 2019-04-29 | 2020-01-29 | 2020-11-09 | 2021-08-26 |
| 2017-09-01 | 2018-08-02 | 2019-05-04 | 2020-02-03 | 2020-11-14 |            |
| 2017-09-06 | 2018-08-07 | 2019-05-09 | 2020-02-08 | 2020-11-19 |            |
| 2017-09-21 | 2018-08-12 | 2019-05-14 | 2020-02-13 | 2020-11-24 |            |
| 2017-09-26 | 2018-08-17 | 2019-05-19 | 2020-02-18 | 2020-11-29 |            |
| 2017-10-11 | 2018-08-22 | 2019-05-24 | 2020-02-23 | 2020-12-09 |            |

**Table S2.** List of acquisition dates of Sentinel-1

|            |            |            |            |            |            |
|------------|------------|------------|------------|------------|------------|
| 2015-03-18 | 2017-07-17 | 2018-06-06 | 2019-04-14 | 2020-02-20 | 2020-12-16 |
| 2015-09-02 | 2017-07-29 | 2018-06-18 | 2019-04-26 | 2020-03-03 | 2020-12-28 |
| 2016-04-17 | 2017-08-10 | 2018-06-30 | 2019-05-08 | 2020-03-15 | 2021-01-09 |
| 2016-10-02 | 2017-09-03 | 2018-07-12 | 2019-05-20 | 2020-03-27 | 2021-01-21 |
| 2016-10-08 | 2017-09-09 | 2018-07-24 | 2019-06-01 | 2020-04-08 | 2021-02-02 |
| 2016-10-14 | 2017-09-15 | 2018-08-05 | 2019-06-13 | 2020-04-20 | 2021-02-14 |
| 2016-10-26 | 2017-09-27 | 2018-08-17 | 2019-06-25 | 2020-05-02 | 2021-02-26 |
| 2016-11-07 | 2017-10-09 | 2018-08-29 | 2019-07-07 | 2020-05-14 | 2021-03-10 |
| 2016-11-19 | 2017-10-21 | 2018-09-10 | 2019-07-19 | 2020-05-26 | 2021-03-22 |
| 2016-12-01 | 2017-11-02 | 2018-09-22 | 2019-07-31 | 2020-06-07 | 2021-04-03 |
| 2016-12-13 | 2017-11-14 | 2018-10-04 | 2019-08-12 | 2020-06-19 | 2021-04-15 |
| 2016-12-25 | 2017-11-26 | 2018-10-10 | 2019-09-05 | 2020-07-01 | 2021-04-27 |
| 2017-01-06 | 2017-12-08 | 2018-10-16 | 2019-09-17 | 2020-07-13 | 2021-05-09 |
| 2017-01-18 | 2018-01-01 | 2018-10-28 | 2019-09-29 | 2020-07-25 | 2021-05-21 |
| 2017-01-30 | 2018-01-13 | 2018-11-09 | 2019-10-11 | 2020-08-06 | 2021-06-14 |

---

|            |            |            |            |            |            |
|------------|------------|------------|------------|------------|------------|
| 2017-02-11 | 2018-02-06 | 2018-11-21 | 2019-10-23 | 2020-08-18 | 2021-06-26 |
| 2017-03-07 | 2018-02-18 | 2018-12-03 | 2019-11-04 | 2020-08-30 | 2021-07-08 |
| 2017-03-19 | 2018-03-02 | 2018-12-15 | 2019-11-16 | 2020-09-11 | 2021-07-20 |
| 2017-03-31 | 2018-03-14 | 2019-01-08 | 2019-11-28 | 2020-09-23 |            |
| 2017-04-12 | 2018-03-26 | 2019-01-20 | 2019-12-10 | 2020-10-05 |            |
| 2017-04-24 | 2018-04-07 | 2019-02-01 | 2019-12-22 | 2020-10-17 |            |
| 2017-05-06 | 2018-04-19 | 2019-02-25 | 2020-01-03 | 2020-10-29 |            |
| 2017-05-18 | 2018-05-01 | 2019-03-09 | 2020-01-15 | 2020-11-10 |            |
| 2017-05-30 | 2018-05-13 | 2019-03-21 | 2020-01-27 | 2020-11-22 |            |
| 2017-06-11 | 2018-05-25 | 2019-04-02 | 2020-02-08 | 2020-12-04 |            |

---
